1  
2  
3  
4  
5  
6  
7  
8  
9  
10  
11  
12  
13  
14  
15  
16  
17  
18  
19  
20  
21  
22  
23  
24  
25  
26  
27  
28  
29

## A phenotypically plastic magic trait promoting reproductive isolation in sticklebacks?

Monica V. Garduno Paz<sup>1,2</sup>, Felicity A. Huntingford<sup>1</sup> and Colin E. Adams<sup>1,3</sup>

This is a pre-print version of a submitted manuscript

<sup>1</sup>*Scottish Centre for Ecology and the Natural Environment, IBAHCM, University of Glasgow, Rowardennan, Glasgow G63 0AW, UK*

<sup>2</sup>*Current academic address: Facultad de Ciencias, Universidad Autónoma del Estado de México, Instituto Literario no. 100 Colonia Centro, Toluca, CP50000, México*

<sup>3</sup> Corresponding author Email: [colin.adams@glasgow.ac.uk](mailto:colin.adams@glasgow.ac.uk)

Orcid identifier number: 0000-0003-2470-9754

**Running title:** A plastic magic trait in sticklebacks

**KEY WORDS:** Assortative mating. Epigenetics. reproductive isolation. trophic polymorphism.

### Abstract

This study identifies one possible mechanism whereby gene flow is interrupted in populations undergoing evolutionary divergence in sympatry; this is an important issue in evolutionary biology that remains poorly understood. Variation in trophic morphology was induced in three-spined stickleback by exposing them from an early age either to large benthic or to small pelagic prey. At sexual maturity, females given a choice between two breeding males, showed positive assortative mate choice for males raised on the same diet as themselves. The data indicate that this was mediated through a preference for males with trophic morphology similar to that of fish with which the females were familiar (from their pre-testing holding tanks). This study has shown for the first time that expression of a plastic trait induced at an early age not only results in specialisation for local foraging regimes but can also play a significant role in mate choice. This is equivalent to an environmentally induced, plastic version of the “magic traits” that promote ecologically-driven divergence in sympatry, hence the proposed descriptor “plastic magic trait”.

## 30 Introduction

31 The process whereby gene flow is interrupted in populations undergoing evolutionary divergence  
32 when in sympatry is an important issue in evolutionary biology that remains poorly understood. One  
33 possible mechanism involves an ecologically important trait under divergent selection also  
34 contributing to reproductive isolation, so-called “magic traits” (Gavrilets 2004; Servedio et al. 2011).  
35 Although evidence of such traits in nature is sparse (Servedio et al. 2011), magic traits are usually  
36 envisaged as inherited and linked to mate choice through pleiotropy. However, much research interest  
37 has focussed on the possible role of phenotypic plasticity in the initiation of evolutionary change  
38 through the development of discrete alternative phenotypes (West-Eberhard 1989, 2003; Fitzpatrick  
39 2012). If expressed alternative phenotypic traits induced by the environment through plasticity, also  
40 form part of the mate choice system of the diverging organism, assortative mating based on such traits  
41 might generate reproductive barriers between individuals presenting different phenotypes  
42 (Fitzpatrick 2012) and thus may act as a magic trait without the requirement of pleiotropy.

43 Discrete alternative phenotypes associated with foraging, or trophic polymorphisms (*sensu* Skúlason  
44 & Smith (Skulason and Smith 1995), have been strongly implicated in sympatric speciation events  
45 (Dieckmann and Doebeli 1999). The divergent morphological traits are often the result of foraging  
46 conditions experienced during development (Day and McPhail 1996; Adams et al. 2003), so can only  
47 result in evolutionary change if mechanisms exist that result in gene pool segregation (West-Eberhard  
48 1989; Smith and Skulason 1996; Schluter 2003). Here we explore one possible mechanism, namely  
49 morph-specific mate choice by breeding females. Using the three-spined stickleback (*Gasterosteus*  
50 *aculeatus*) as a model system, we present an example of a developmentally-plastic, trophic  
51 specialisation acting as a magic trait generating reproductive isolation and suggest a mechanism  
52 through which this comes about.

53 Trophic polymorphism is particularly common among freshwater fishes, including sticklebacks, it  
54 often takes the form of co-existing but discrete phenotypes with morphological and behavioural  
55 specialisations for feeding on benthic invertebrates in the littoral zone or zooplankton in the pelagic  
56 zone (Skulason and Smith 1996; Adams and Huntingford 2002a; Proulx and Magnan 2004). Typically,  
57 the benthic form is robust, with a large mouth, small eyes and few short gill rakers, while the pelagic  
58 form is lightly built, with a relatively small mouth, large eyes and longer and more numerous gill rakers  
59 (Adams et al. 1998; Adams and Huntingford 2002a). Although in some cases the two sympatric forms  
60 are fully reproductively isolated, more commonly reproductive isolation is partial, weak or non-  
61 existent (Schluter and McPhail 1992; Hendry et al. 2009).

62 The main aim of this study was, having induced variable trophic morphology in three-spined  
63 sticklebacks from a single population by manipulating early feeding regimes, to determine whether  
64 these plastic, diet-induced differences in trophic morphology were associated with different patterns  
65 of mate choice. A second aim was to seek possible behavioural mechanisms that might explain the  
66 observed patterns of mating.

## 67 **Methods**

### 68 ***Diet Treatments***

69 240 juvenile three-spined sticklebacks fry (5-9 mm length) were collected by dip nets from a small  
70 freshwater pond in Scotland (56°3'N; 004°21'W) and transported to rearing facilities at the Scottish  
71 Centre for Ecology and the Natural Environment (SCENE), Glasgow University, Loch Lomond. Fish were  
72 assigned randomly in groups of 40 to 6 rearing aquaria (21L) and raised in the laboratory for 11  
73 months, during which time they were fed twice daily to satiation on one of two diet treatments known  
74 to induce differences in trophic morphology (Day and McPhail 1996). Half of the groups were fed on  
75 frozen *Daphnia* spp in a bag hanging at the water surface, simulating pelagic prey; the rest were fed  
76 on frozen chironomid prey placed on the bottom of the tank, simulating benthic prey.

77

### 78 ***Analysis of Induced Morphological Differences***

79 After 10 months, the sticklebacks were anaesthetised with benzocaine and photographed on their  
80 left side with a Canon EOS digital 350D camera (8.0 megapixels). The sexually-mature fish used in  
81 mate choice experiments were re-photographed at 11 months immediately following the mate  
82 choice experiments. Size and shape were quantified and diet groups compared on the basis of 20  
83 landmarks and landmark position was analysed using a Relative Warp Analysis (Rolf, 2006). The  
84 second relative warp (analogous to a Principal Component), which explained 13% of the total shape  
85 variation, opposed traits typical of pelagic and benthic feeders (Day and McPhail 1996; Figure S1).

86

### 87 ***Mate Choice Trials***

88 Twenty eight females (21 from the chironomid diet and 7 from the *Daphnia*. diet) and 36 males (21  
89 from the chironomid diet and 15 from the *Daphnia* diet) were used in trials of mate choice (Kraak and  
90 Bakker 1998). Female mate choice was examined using a well-tested methodology in which a single  
91 gravid female was placed alone in an aquarium (35 x 25 x 20 cms, screened on 3 sides), allowed to  
92 settle for 12h and was then presented simultaneously with two breeding males in equally-sized  
93 sections (25 x 35 x 20 cms) of an adjacent aquarium. During trials, females could see both males, but  
94 the males were separated by an opaque partition and so did not have visual contact with each other.  
95 In any trial, the female was presented with one *Daphnia*-fed and one chironomid-fed male. To avoid

96 effects of size and familiarity with specific males, the two males in any given trial were size-matched  
97 as far as possible and importantly taken from a different rearing tank from the female.

98

99 Each trial lasted for 5 minutes, during which, the time the female spent on the side of the tank adjacent  
100 to each male was recorded. Three replicates of each pairing trial were conducted, swapping the male  
101 position each time. A female was deemed to have chosen a male if she spent at least 60% of the total  
102 time of the trial near that male (Kraak and Bakker 1998). Males and females were used maximally in  
103 four trials on different days; males were re-used in fresh combinations so that the female was never  
104 exposed to the same pair of males. Although male pairs were matched in size as nearly as possible,  
105 small discrepancies between pairs remained. No significant difference in size was detected between  
106 chosen and rejected males (mean  $\pm$  SE size differences between accepted and rejected males = 0.04  
107 cm  $\pm$  0.02 one sample T test: T = 1.68, p = 0.10).

108

## 109 **Results**

### 110 **Effects of Diet on Morphology**

111 The second relative warp varied markedly both between and within diets. Effects of gender (ANOVA:  
112  $F_{1,60} = 3.11$ ; p=0.08) and of gender by diet (ANOVA:  $F_{1,60} = 2.86$ ; p= 0.09) were not significant. However,  
113 there was a highly significant difference in morphology between the chironomid fed (mean  $\pm$  SE =  
114 6.753  $\pm$  0.23) and *Daphnia* fed sticklebacks (mean  $\pm$  SE = 4.82 + 0.34. ANOVA:  $F_{1,60} = 22.2$ ; p< 0.0001).

115 The higher scores of fish fed on the benthic diet reflected shorter heads, shorter maxillary bones,  
116 smaller eyes and deeper bodies. This score was transformed to create only positive values (by adding  
117 6 and multiplying by 100) and hereafter this dimension of shape variation is referred to as the pelagic-  
118 benthic (PB) shape score. Lower PB scores indicate shapes tending towards a more typical of a pelagic  
119 foraging fish; higher scores tending towards a more benthic foraging fish shape.

120

### 121 **Mate Choice In Benthic- And Pelagic-Fed Females**

122 Retrospective examination showed a range of differences in PB score between test males across all  
123 trials. In all of the following analyses, tests in which there was effectively no difference in diet-related  
124 morphology between the test males (that is where the difference in PB score was <0.50) were omitted.  
125 In addition, trials involving one pair of males both of which had an extreme pelagic-like morphology  
126 (a low PB shape score) were also omitted. Thus a total of 88 trials was analysed further. Since in nature,  
127 female sticklebacks review a number of males before selecting a nest in which to lay her eggs and  
128 since the females in this study were always tested with different pairs of (unfamiliar) males, trials on

129 the same female were considered as independent. Table 1a shows the frequency with which benthic  
130 diet-fed and pelagic diet-fed females chose or rejected the male with the lower PB score (i.e. with a  
131 more pelagic-like morphology). Overall there was a significant difference in preference between  
132 females reared on benthic (chironomid) and pelagic (*Daphnia*) diets. Pelagic diet-reared females were  
133 significantly more likely to accept the male with the lower pelagic-benthic score (i.e. more pelagic-  
134 like; 73% of trials  $\chi^2 = 6.53$ .  $P = 0.01$ ); benthic diet-reared females showed no preference between  
135 males (male with lower score chosen in 47% of trials.  $\chi^2 = 0.27$ .  $P = 0.60$ ).

136

137 As a more conservative test of non-random mating by trophic morphology, the overall mate choice of  
138 individual females was expressed as the proportion of trials in which she took part where the male  
139 with the lower PB score was selected. This proportion was significantly higher for females reared on a  
140 pelagic diet (Figure 1a. T test:  $T = 3.59$ .  $df = 12$ .  $P = 0.004$ ). The preference score was significantly  
141 greater than 50% for pelagic diet-reared females (One sample  $T = 3.67$ .  $N=7$ .  $P < 0.01$ ), but not for  
142 benthic diet-reared females (One sample  $T = 1.05$ .  $N = 17$ .  $P = 0.31$ ). This analysis confirms that females  
143 reared on the pelagic diet tended to prefer the male with the lower PB score (more pelagic-like males),  
144 whereas females reared on a benthic diet were non-selective. Our data therefore demonstrate partial  
145 assortative mating by diet-induced phenotype, based on the behaviour of pelagic-reared females.

146

147

#### 148 **Behavioural Mechanisms Of Mate Choice**

149

150 To explore possible mechanisms for this difference in female preference by diet, behavioural data  
151 were analysed in more detail. Females were reclassified with respect to their own trophic morphology  
152 (as opposed to their diet). Females with PB scores greater than 6 were classified as benthic-like and  
153 those with scores lower than 6 were classified as pelagic-like. No difference in mate preference were  
154 found in females classified in this way (Table 1b), nor was there a difference in the proportion of trials  
155 in which the females chose the more pelagic-like male (lower PB score). Mean  $\pm$  SD PB score of  
156 preferred male =  $5.2 \pm 2.0$  and  $5.3 \pm 1.9$  for females below and above the mean respectively (T test:  $T$   
157 =  $0.08$ .  $df = 17$ .  $P = 0.94$ ). Therefore the effect of rearing diet on mate choice described above is not a  
158 simple consequence of the females' own morphology.

159

160 Another possible behavioural mechanism by which rearing diet might influence a female stickleback's  
161 mate choice is through previous experience of the fish with which she was reared, whose shape will,  
162 on average, reflect their common rearing diet. To test this possibility, we took advantage of the  
163 variability in PB scores between rearing tanks on a given diet, relating preferences expressed in the  
164 mate choice tests to the average trophic morphology of the fish with which the females had been

165 raised. The mean morphology of fish in the rearing tank was thus classified as ‘pelagic-like’  
166 morphology for a tank mean PB score of less than 6 (nominally category P: actual values: 4.2 and 5.5),  
167 ‘neutral morphology’ with a PB score between 6 and 7 (category N: actual values: 6.1 and 6.3) and  
168 ‘benthic-like’ morphology with a PB score of more than 7 (category B: actual values: 7.06, 7.1 and 7.4).  
169 Females reared in these three categories of tank were thus accustomed to seeing fish with pelagic-  
170 like morphology, neutral morphology and benthic-like morphology, respectively. Table 1c shows the  
171 numbers of females from these three tank categories that preferred or rejected the more pelagic-like  
172 of the two males in choice experiments, and the percentage preference for the more pelagic-like male.  
173 There was a significant effect of tank morphology category on mate choice, with a threshold change  
174 above 7, at which the preference shifts from the more pelagic-like to the more benthic-like male. It  
175 would seem that the female sticklebacks in this study have a base-line tendency to prefer the more  
176 pelagic-like of two males, but that this preference is weakened and to some extent reversed by long-  
177 term exposure to benthic-like fish.

178

179 To explore further the determinants of mate choice, firstly we looked for an effect of the magnitude  
180 of the difference in trophic morphology between the pair of males used in each trial. Figure 1b shows  
181 the mean ( $\pm$ SE) of the difference in magnitude of the PB score between males in trials in which the  
182 least pelagic shape male was chosen or rejected, in relation to rearing tank mean shape category.  
183 There was no main effect for tank (ANOVA:  $F_{1,83} = 0.22$ .  $P = 0.80$ ) or outcome (ANOVA:  $F_{1,83} = 0.08$ .  $P =$   
184  $0.78$ ). However, there was a significant interaction (ANOVA:  $F_{1,83} = 3.44$ .  $P = 0.04$ ). For females reared  
185 in tanks of category N, used to seeing fish with neutral trophic morphology, there was no relationship  
186 between how different males in the pair-wise choice were and whether the male with the higher or  
187 lower PB score was chosen. For females reared in tanks of category P (PB score  $<6$ ), which were  
188 accustomed to seeing pelagic-like morphology fish and for trials in which the male with the more  
189 pelagic-like phenotype was chosen (the “correct” choice for assortative mating by diet-induced  
190 trophic morphology), there was a larger morphological difference between the male pair presented.  
191 For females in category B (PB score  $>7$ ), which were used to seeing benthic-like morphology fish, the  
192 magnitude of the morphological difference was larger in trials in which the male with the more benthic  
193 phenotype was chosen (the “correct” choice in this case). In other words, females were more likely to  
194 choose males with a familiar phenotype when the difference between target males is large and  
195 presumably easy to assess.

196 Although females reared in tanks with an average PB score of  $>7$  were more likely than females from  
197 the other tank categories to choose the more benthic-like of two males, they did not always do so,  
198 even when the size difference was large enough to be easily perceived. To explore possible causes for

199 such “incorrect” choices, we compared the absolute PB score of the rejected male in cases in which  
200 the more benthic-like male was chosen or rejected, for females from the tank category B (Figure 1c).  
201 In trials in which the females chose the more pelagic-like male (the “incorrect” choice for assortative  
202 mating in females from tank category B), the rejected, benthic-like males had significantly higher PB  
203 scores than in trials in which the more benthic-like male was preferred (T test:  $T = 6.67$ .  $df = 35$ .  $P >$   
204  $0.001$ ). This indicates that females are avoiding males with extreme PB scores in favour of a mate with  
205 a PB score closer to the average.

## 206 **Discussion**

207 Our results confirm the findings of previous studies demonstrating a plastic response of  
208 morphological traits to rearing diet in three-spined sticklebacks (Day and McPhail 1996). More  
209 significantly, they have demonstrated for the first time that exposure to different diets during the  
210 juvenile phase can influence the mating preferences shown by breeding females. Thus, females  
211 reared on the pelagic diet tended to prefer the male with a more pelagic-like morphology; females  
212 reared on a benthic diet however mated randomly with respect to trophic morphology. Thus there is  
213 partial assortative mating by diet-induced phenotype. Unlike the case of assortative mating on the  
214 basis of diet specialisation in the mustard leaf beetle, which appears to use olfactory cues to identify  
215 mates (Geiselhardt et al. 2012) the sticklebacks in this experiment only had visual cues available  
216 to them. However, it is quite possible that olfactory cues might also have affected mate choice had  
217 they been available. In addition, the effect reported here did not result from female familiarity with  
218 specific individual males, as females were never tested with males from the same rearing tank.

219 We additionally show that mate choice was not dependent directly of the female’s own  
220 trophic morphology. Arguably, this is not surprising, since it is difficult to see how a female  
221 stickleback could know what her own morphology is like. Instead the differences in mate choice  
222 must be a consequence (direct or indirect) of the experience of being raised on a pelagic or a benthic  
223 diet. Making use of the significant variation in morphology between and within rearing tanks  
224 exposed to different and the same diets, we show that the expressed morphology of other fish with  
225 which the female is familiar (from the same rearing tank) is a good predictor of mate choice,  
226 particularly for fish from tanks expressing a pelagic-type morphology. It is highly likely that in the  
227 wild also sticklebacks grow up with fish exploiting a similar diet to themselves and thus with similar  
228 diet-induced morphology, as individuals exploiting the same foraging resources are more likely to  
229 come into contact with each other, than those that do not share a common diet (Garduño-Paz and  
230 Adams 2010).

231 Despite a clear tendency for assortative mating by trophic morphology, females quite often made  
232 the opposite choices. This was most often the case when the difference between the two males was  
233 relatively small, but also occurred when if the morphology of the predicted choice male was an  
234 extreme benthic or pelagic-type morphology. One can envisage at least two plausible mechanistic  
235 explanations for this, which are not mutually exclusive. It may be that, rather than responding to  
236 familiarity *per se*, females have learned about the foraging efficacy of fish with the range of  
237 morphologies that she has experienced during development. If this were the case, this could result  
238 in the avoidance of males of extreme morphology, even if this morphology is familiar to her.  
239 Alternatively, it may be that particularly extreme morphologies may invoke some other behavioural  
240 response such as the fear. The data from the experiment reported here do not allow us to  
241 distinguish which, if either of these possibilities may be operating here.

242 Although coexisting trophic morphs are thought to play a part in sympatric speciation (Skulason et  
243 al. 1999), this is unlikely to be completed without some mechanism for morph-specific assortative  
244 mating (Skulason et al. 1999). Several routes though which this might occur have been suggested.  
245 For example specialist morphs might occupy different habitats. Olafsdottir and co-workers  
246 (Olafsdóttir et al. 2006) for example, showed that sticklebacks specialising in living in habitats with  
247 little vegetation had reduced nest building behaviour and as a result weed-living specialists from the  
248 same lake mated assortatively with other weed-living specialists when using nest quality as a mate  
249 choice criterion. Disruptive sexual selection is also known to play a significant role in the divergence  
250 of recently evolved African cichlid species (Stelkens et al. 2008). Here uniquely we demonstrate  
251 assortative mating on the basis of morphological traits that frequently express as discrete forms in  
252 the wild, have strong functional significance for resource acquisition (Adams and Huntingford 2002b)  
253 are thought to be under strong selection pressure and the expression of which is significantly  
254 modulated by plasticity effects. This result indicates that trophic morphology is both a plastic and a  
255 magic trait for sticklebacks, thus that pleiotropy may not always be required for traits to operate as  
256 magic traits.

## 257 **Acknowledgements**

258 We thank Rona Brennan for technical support. M.V.G-P. was supported by a Mexican Council for  
259 Science and Technology (CONACYT) scholarship.

260

## 261 **References**



- 262 Adams C E, Fraser D, Huntingford F A, Greer R B, Askew C M, Walker A F (1998) Trophic  
263 polymorphism amongst Arctic charr from Loch Rannoch , Scotland. J Fish Biol 52:1259–1271
- 264 Adams C E, Woltering C, Alexander G (2003) Epigenetic regulation of trophic morphology through  
265 feeding behaviour in Arctic charr, *Salvelinus alpinus*. Biol J Linn Soc 78:43–49
- 266 Adams C, Huntingford F (2002a) Inherited differences in head allometry in polymorphic charr from  
267 Loch Rannoch, Scotland. J Fish Biol 60:515–520
- 268 Adams C, Huntingford F (2002b) The functional significance of inherited differences in feeding  
269 morphology in a sympatric polymorphic population of Arctic charr. Evol Ecol 16:15–25
- 270 Day T, McPhail J (1996) The effect of behavioural and morphological plasticity on foraging efficiency  
271 in the threespine stickleback (*Gasterosteus* sp.). Oecologia 108:380–388
- 272 Dieckmann U, Doebeli M (1999) On the origin of species by sympatric speciation. Nature 400: 354–  
273 357
- 274 Fitzpatrick B (2012) Underappreciated consequences of phenotypic plasticity for ecological  
275 speciation. Int J Ecol 2012:Article ID 256017
- 276 Garduño-Paz M V, Adams C E (2010) Discrete prey availability promotes foraging segregation and  
277 early divergence in Arctic charr, *Salvelinus alpinus*. Hydrobiologia 650:15–26
- 278 Gavrillets S, (2004) Fitness landscapes and the origin of species. Princeton University Press, Princeton
- 279 Hendry A P, Huber S K, De León L F, Herrel A, Podos J (2009) Disruptive selection in a bimodal  
280 population of Darwin’s finches. Proc Biol Sci 276:753–759
- 281 Kraak SBM, Bakker TCM (1998) Mutual mate choice in sticklebacks: attractive males choose big  
282 females, which lay big eggs. Animal Behaviour 56: 859-866
- 283 Geiselhardt S, Otte T, Hilker M (2012) Looking for a similar partner: host plants shape mating  
284 preferences of herbivorous insects by altering their contact pheromones. Ecology Letters 15: 971–  
285 977
- 286 Olafsdóttir G A, Ritchie M G, Snorrason SS (2006) Positive assortative mating between recently  
287 described sympatric morphs of Icelandic sticklebacks. Biol Lett 2:250–252

- 288 Proulx R, Magnan P (2004) Contribution of phenotypic plasticity and heredity to the trophic  
289 polymorphism of lacustrine brook charr (*Salvelinus fontinalis*). *Evol Ecol Res* 6:503–522
- 290 Rohlf FJ (2006) TpsDig, version 2.10. Available at <http://life.bio.sunysb.edu/morph>. Accessed 28  
291 August 2018
- 292 Schluter D (2003) Frequency dependent natural selection during character displacement in  
293 sticklebacks. *Evolution* 57:1142–1150
- 294 Schluter D, McPhail J D, (1992) Ecological character displacement and speciation in sticklebacks. *Am*  
295 *Nat* 140:85–108
- 296 Servedio M R, Van Doorn G S, Kopp M, Frame AM, Nosil P (2011) Magic traits in speciation: “magic”  
297 but not rare? *Trends Ecol Evol* 26:389–97
- 298 Skulason S, Smith TB (1995) Resource polymorphisms in vertebrates. *Trends Ecol Evol* 10:366–70
- 299 Skulason S, Smith TB (1996) The ecology of resource polymorphism in vertebrates - Reply. *Trends*  
300 *Ecol Evol* 11:26
- 301 Skulason S, Snorrason S, Jonsson B (1999) Sympatric moprhs populations and speciation in  
302 freshwater fish with emphasis on arctic charr. In Magurran A and May R, (eds) *Evolution of biological*  
303 *diversity*. Oxford University Press, Oxford pp. 70–92
- 304 Smith T B, Skulason S (1996) Evolution significance of resource polymorphisms in fishes, amphibians,  
305 and birds. *Ann Rev Ecol Syst* 27:111-133
- 306 Stelkens R B, Pierotti MER, Joyce D A, Smith AM, van der Sluijs I, Seehausen O (2008) Disruptive  
307 sexual selection on male nuptial coloration in an experimental hybrid population of cichlid fish.  
308 *Philos Trans R Soc London B* 363:2861–2870
- 309 West-Eberhard MJ (1989) Phenotypic plasticity and the origins of diversity. *Ann Rev Ecol Syst*  
310 20:249–278
- 311 West-Eberhard MJ, (2003) *Developmental plasticity and evolution*. Oxford University Press, Oxford.
- 312
- 313

314 Table 1. The frequency with which the male with the higher pelagic-benthic score (more benthic-  
 315 like) was chosen and rejected by female sticklebacks classified a) by diet, b) by Pelagic-Benthic (PB)  
 316 score and c) by tank PB category.

317 a)  
 318

|               | Male with lower P-B score |          |
|---------------|---------------------------|----------|
| Female diet   | Chosen                    | Rejected |
| Benthic       | 27                        | 31       |
| Pelagic       | 22                        | 8        |
| $\chi^2$ DF P | 5.75                      | 2 0.015  |

319  
 320  
 321 b)

|                 | Male with lower P-B score |          |
|-----------------|---------------------------|----------|
| Female PB score | Chosen                    | Rejected |
| High            | 30                        | 26       |
| Low             | 18                        | 14       |
| $\chi^2$ DF P   | 0.60                      | 2 0.74   |

323  
 324  
 325 c)

|               | Male with lower P-B score |          |          |
|---------------|---------------------------|----------|----------|
| Tank mean     | Chosen                    | Rejected | % chosen |
| 4-5           | 10                        | 6        | 63       |
| 6             | 24                        | 10       | 71       |
| 7+            | 16                        | 22       | 42       |
| $\chi^2$ DF P | 6.2                       | 2        | <0.05    |

327  
 328  
 329  
 330

331

## Figure legends

332 Figure 1. A) The mean (+SE) proportion of trials in which individual females reared on the pelagic and  
333 the benthic diet preferred the more pelagic-like of two males (the male with the lowest PB score);  
334 0.5 represents no preference. B) The mean (+SE) difference in PB score between males in pairwise  
335 trials in which the male with the lowest PB morphology score (i.e. more pelagic-like) was chosen or  
336 rejected, according to category of tank in which the female was reared (mean tank PB score: <6, 6-7  
337 and >7 (more pelagic-like, neutral and benthic-like in morphology respectively)). For females in tanks  
338 with mean PB score <6 and >7, dark grey indicates cases there the “correct” male (i.e. most similar  
339 to the tank mean) was chosen. C) The mean (+SE) PB score for the rejected male in pairwise trials on  
340 females reared in tanks with a mean PB score of >7 in which the male with the highest PB score was  
341 rejected or chosen.

342

343

### 344 **Supplementary Material**

345 Figure S1. The landmark configurations used in the morphometric analysis of trophic  
346 morphology in sticklebacks. The landmarks are connected to aid visualisation of fish shape.  
347 Arrows represent vectors describing deformations that change the mean shape of sticklebacks  
348 fed on benthic prey to the mean shape of those fed on pelagic prey.

349

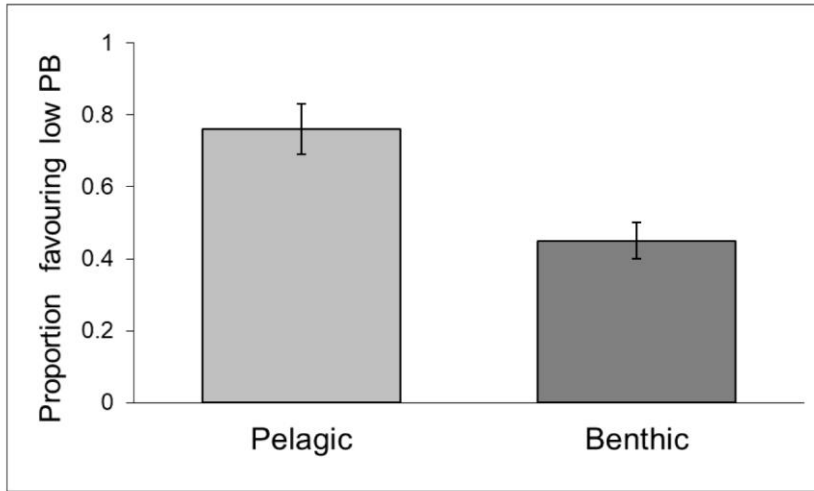

1A

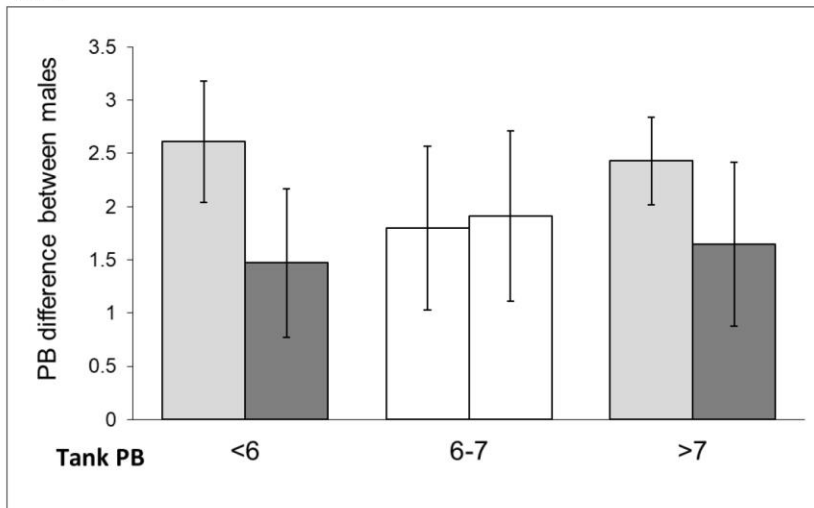

1B

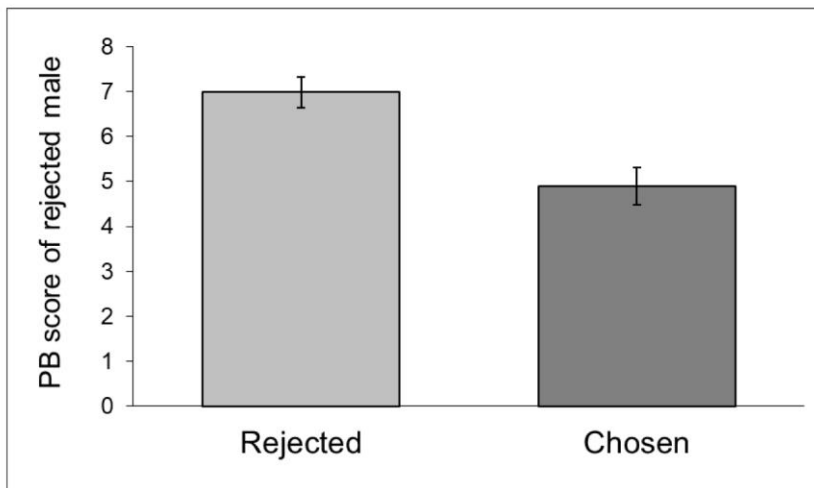

1C

350

351

352

353 Supplementary material Fig S1

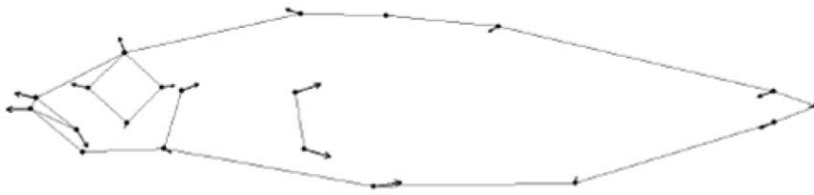

354
